# Supplementary material
Source: PubMed Central journal article supplement (PMC3689886)
Supplement: NIHMS440243-supplement-Supporting_Information.pdf [file NIHMS440243-supplement-Supporting_Information.pdf]

# **CHEMISTRY**

---

## **AN ASIAN JOURNAL**

### Supporting Information

© Copyright Wiley-VCH Verlag GmbH & Co. KGaA, 69451 Weinheim, 2011

#### **Cytocompatible Poly(ethylene glycol)-*co*-polycarbonate Hydrogels Cross-Linked by Copper-Free, Strain-Promoted Click Chemistry**

**Jianwen Xu, Tera M. Fillion, Fioleda Prifti, and Jie Song\*<sup>[a]</sup>**

asia\_201100411\_sm\_miscellaneous\_information.pdf

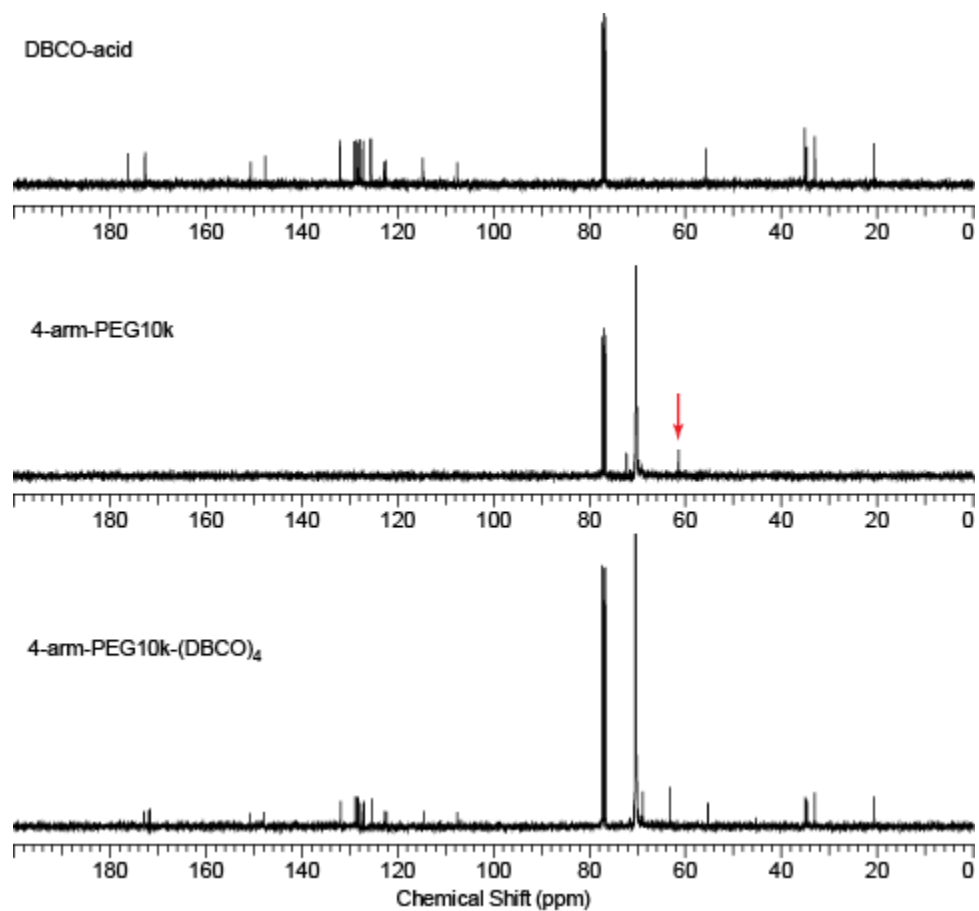

**Figure S1.**  $^{13}\text{C}$  NMR of 4-arm-PEG10k-(DBCO)<sub>4</sub> showing the disappearance of the characteristic peak for  $-\text{CH}_2\text{OH}$  end-groups of 4-arm-PEG10k from 61.4 ppm (red arrow), supporting complete esterification of  $-\text{CH}_2\text{OH}$  by DBCO-acid.

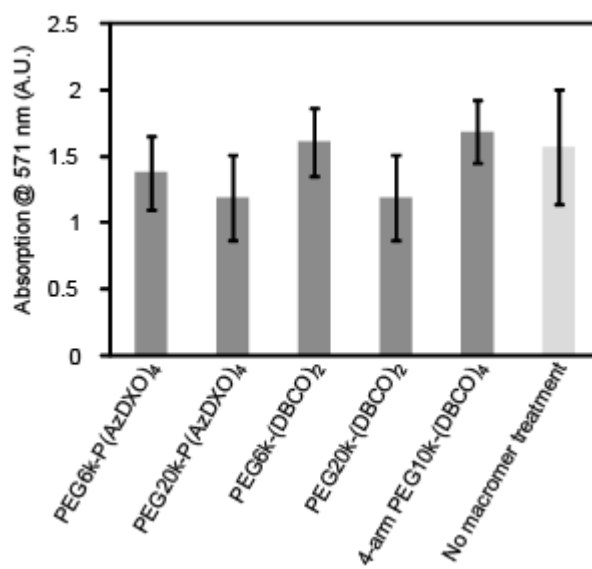

**Figure S2.** MTT viability assay of BMSC cells cultured on 96-well tissue culture plates in the presence of PEG-P(AzDXO)<sub>2m</sub> and PEG-(DBCO)<sub>x</sub> macromers showing cell viability at 48 h comparable to those cultured in the absence of any macromers. For cell seeding, BMSC cell suspension (10<sup>6</sup> cells/mL, 50  $\mu$ L) in expansion media ( $\alpha$ -MEM without ascorbic acid, 20% FBS) containing 0 or 10 w/v% macromers was added to each well of the 96-well plate before an extra 200  $\mu$ L of expansion media was added. No statistically significant difference was observed between any of the macromer-treated cultures and the no-macromer control culture ( $p > 0.05$ ; student t-test).
